# Supplementary material
Source: publisher figshare collection journal article supplement (https://acs.figshare.com/ndownloader/files/20163638)
Supplement: Supplementary file 1 [file 20163638]

**Synthesis of 1D-Anisotropic Particles Consisting of TiO<sub>2</sub> Nanorod and  
SnO<sub>2</sub> with Heteroepitaxial Junction and the Self-Assembling to  
3D-Microsphere**

**Atsunobu Akita and Hiroaki Tada\***

Graduate School of Science and Technology, Kindai University, 3-4-1, Kowakae, Higashi-Osaka,  
Osaka 577-8502, Japan

\* To whom correspondence should be addressed: TEL: +81-6-6721-2332, FAX:  
+81-6-6727-2024,

E-mail: [h-tada@apch.kindai.ac.jp](mailto:h-tada@apch.kindai.ac.jp).

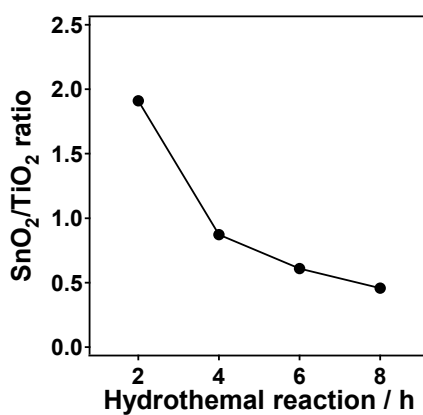

**Figure S1.** Plots of the ratio of the diffraction peak intensity of SnO<sub>2</sub>(110) to that of TiO<sub>2</sub>(110) versus hydrothermal reaction time

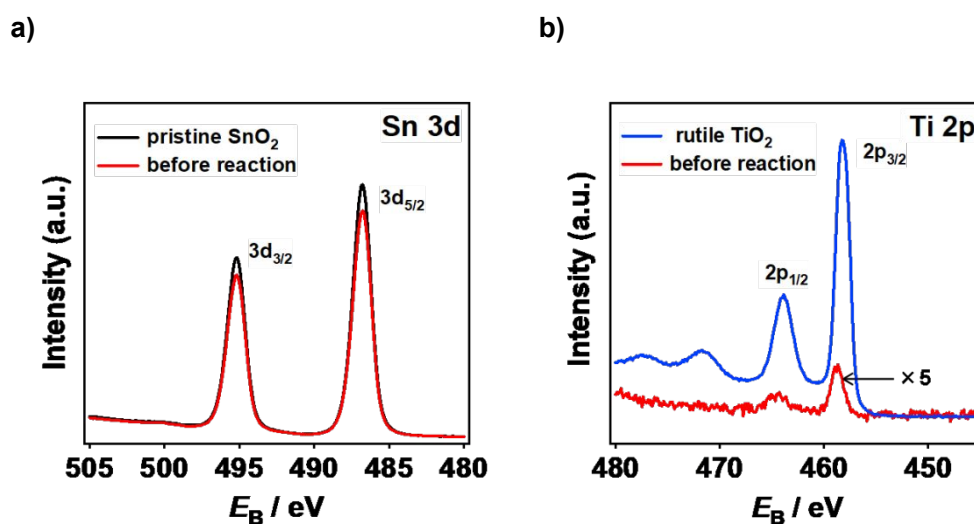

**Figure S2.** (a) Sn3d-XPS spectra for the sample before the hydrothermal reaction, and pristine SnO<sub>2</sub> for comparison. (b) Ti2p-XPS spectra for the sample before the

a)

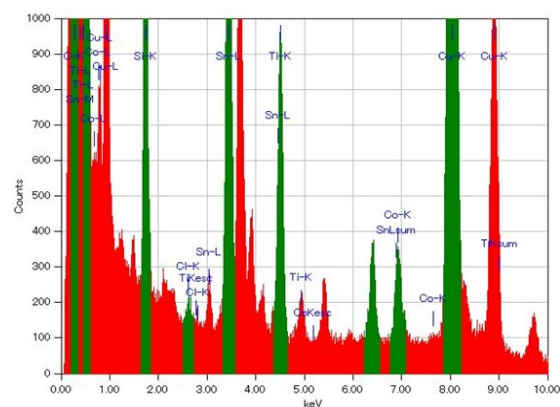

b)

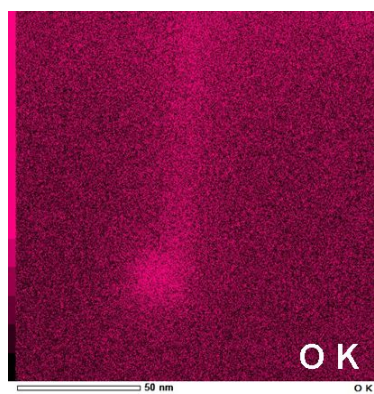

c)

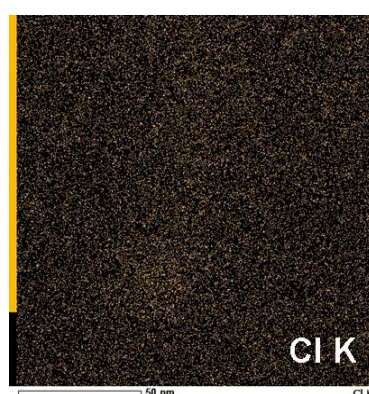

**Figure S3.** ED spectrum (a) and the elemental mapping for a particle prepared by the

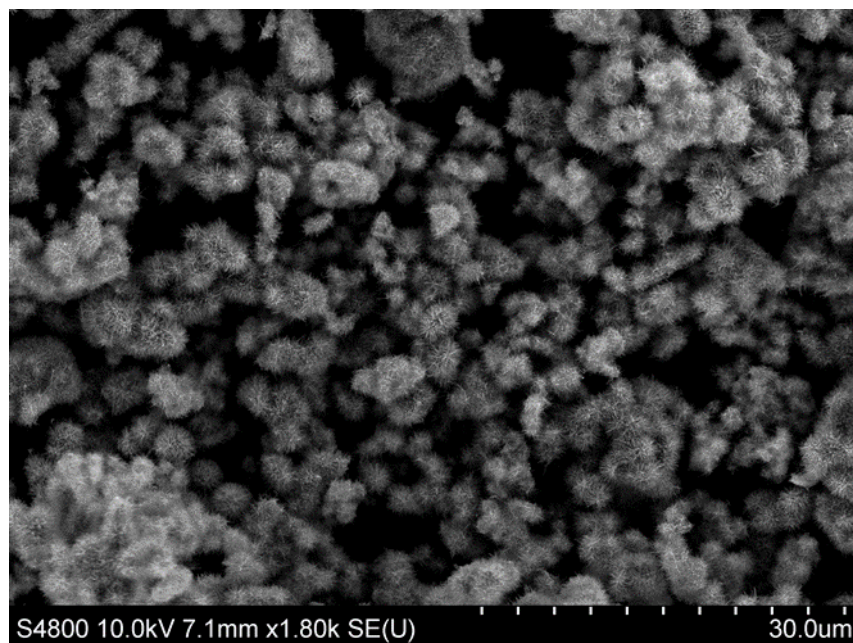

**Figure S4.** SEM image for the sample prepared at  $t_{\text{HT}} = 8$  h.

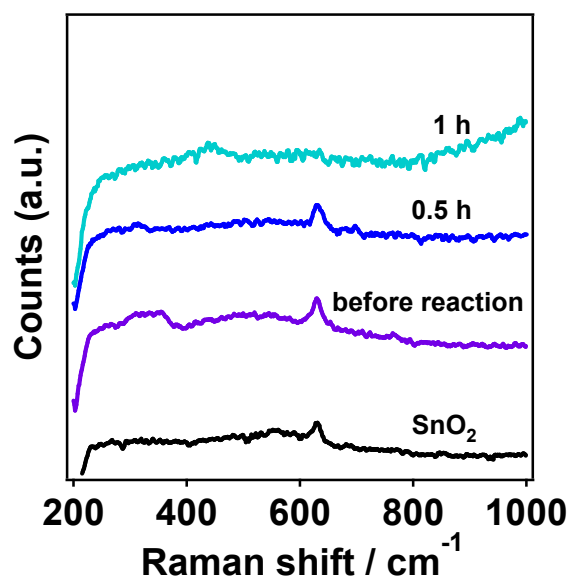

**Figure S5.** Raman spectra for unmodified  $\text{SnO}_2$  and  $\text{TiO}_2\text{-NR}\#\text{SnO}_2$  prepared at  $t_{\text{HT}} \leq 1$  h.
